# Supplementary material for: A sacrificial additive agent mediated strategy for high performance sodium ion capacitor
Source: Research Square preprint supplement (doi:10.21203/rs.3.rs-7278220/v1), 2025-08-11
Supplement: Supplementary file 1 [file 6555a9a27c018a9317a1334f.docx]

***Electronic Supplementary Information (ESI)***

**A sacrificial additive agent mediated strategy for high performance sodium ion capacitor**

Zhaowen Huanga, Xiaolin Lia, Yang Hub, Jingbo Liua* Manlan Guoa, Fenglin Wanga, Xianjie Yanga, Longwen Chena, Youpeng Lia*

*aSchool of Energy and Automotive Engineering, Shunde Polytechnic University, Foshan 528300 China.*

*bQing Yun Senior High School, shunde, Foshan,* *528313, China.*

**Corresponding author, E-mail*: [youpli@163.com](mailto:youpli@163.com) (Y. Li); [liu.jingbo@qq.com](mailto:liu.jingbo@qq.com) (J. Liu)

**Experimental**

**1. Preparation of composite di-sodium squarate-AC electrode**

Di-sodium squarate salt was synthesized using the acid 3,4-dihydroxy-3-cyclobutene-1,2-dione and sodium carbonatewith 1:1 molar ratio in 80 mL deionized water to stir overnight. Then, the deionized water was removed by using a Buchi®rotavapor and dried under a vacuum at 60 °C.

To prepare composite positive electrodes, 0.40 g of di-sodium squarate, 0.40 g of commercial Kuraray activated carbon (AC), 0.15 g of carbon black, and 0.05 g of Polytetrafluoroethylene (PTFE) powder were mixed in a mortar to obtain the products. The final composition consists of 40 wt% of di-sodium squarate, 40 wt% of AC, 15 wt% of Super C and 15 wt% of PTFE, which was rolled between two plastic foils to form a self-standing sheet with thickness of 120 μm. Self-standing discs (diameter = 16 mm) or square electrodes (2 cm × 2 cm) were cut from the sheet inside the glove box (the ppm of water and oxidation below 0.1) by using hollow punchers, respectively. Then, self-standing square electrodes (2 cm × 2 cm) were attached to an Al foil (thickness 35 µm) and coated with conductive glue. Finally, the electrodes were dried under vacuum at 120°C for 12 h.

**2. Preparation of hard carbon negative electrodes**

A slurry was prepared by mixing 0.91 g of commercial Kureha hard carbon, 0.08 g of PVDF solution dispersed in 2 mL 1-methyl-2-pyrrolidinone and 0.01 g of carbon black for 15 minutes. The final composition of the negative electrode was 91 wt.% of hard carbon or graphite, 8 wt.% of PVDF, and 1 wt.% of carbon black. Next, the slurry was coated on Al foil and dried under vacuum at 120 °C for 12 h. Next, the coated Al foil was calendared with a laboratory roll press until reaching a thickness of approximately 70 μm, allowing the electrode material density increased and contacting with the current collector to be improved. Finally, negative electrodes were cut with the size of 2 cm × 2 cm.

**3. Assembly of sodium ion capacitor**

When considering the device's packaging, adjusting the quality of the positive and negative electrodes is very important. The pouch-type di-sodium squarate-AC//hard carbon is assembled with di-sodium squarate-AC positive electrode, and the negative electrode was hard carbon, respectively. The electrolyte for Na+ capacitors is 1 mol L-1 NaClO4 in EC:PC (vol. ratio 1:1).

The positive and negative electrodes (2 cm × 2 cm), coated by AC(YP-50F) reference electrode (92.5 wt% of YP-50F, 2.8 wt% of Super C, 4.7 wt% of PVDF; 1 cm × 2 cm) and two glass microfiber membranes GF/A (3 cm × 4 cm), were cut and dried under vacuum at 120 °C for 12 h in the glass oven (Büchi B-585). For both electrodes, two pieces of GF/A separator and YP-50F reference electrode were introduced in a pouch cell consisting of Al laminated film (5 cm × 30 cm), and 2.0 mL of electrolyte was introduced inside the cell. Afterward, each cell was degassed for 12 s under vacuum before closing and sealing with a Vacuum Packer. After assembly, the pouch cells were allowed to stabilize at open circle voltage (OCV) for 12 h to enable the electrolyte to penetrate the porosity of the electrodes. The oxidation of the squarate anion and pre-sodiation of the anodic host was performed by charging the di-sodium squarate-AC//hard carbon cells at C/20 (where C corresponds to the theoretical capacity of di-sodium, *i.e.* 339 mAh g-1) until reaching cell voltage of 3.9 V for sodium-ion capacitor. Afterward, the sodium-ion capacitors were conditioned by floating at the cut-off voltage for 5h. Finally, the sodium-ion capacitors were continually charged and discharged at 2 A g-1 (based on the per total mass of the two electrodes) for cycling performance.

**4. Material and electrodes characterizations**

The crystal structures of di-sodium squarate are measured with a D8 X-ray diffraction (Bruker AXS). The vibrational bands of di-sodium squarate powders and electrodes are carried out by a Raman spectroscope. Electrochemical mass spectrometry was used to test the gas evolution during the oxidation of di-sodium squarate. Morphological characterization was conducted using a scanning electron microscope (SEM, Quanta FEG 250) equipped with energy-dispersive X-ray spectroscopy (EDS).

**5. Electrochemical measurements**

The electrochemical performance of the sodium-ion capacitors is tested using cyclic voltammetry at 0.05 mV s-1 and chronopotentiometry at C/20 in the potential range from ca. 2.5 V to 4.1 V.

**Figures**

**1-Raman spectrum on Na2C4O4**.

Synthesized Na2C4O4 powder was carried out by Raman spectroscopy with DXR-2 computer-controlled Raman microscope (ThermoFisher Scientific®, USA). The laser was operating at 532 nm from 250 cm-1 and 2000 cm-1.


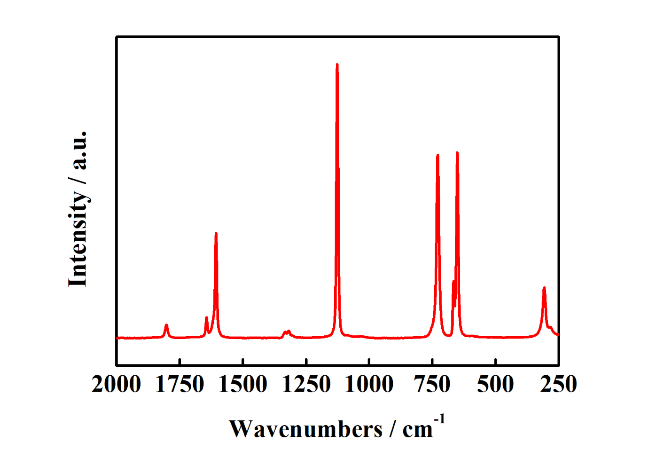


Fig. S1. Raman spectra of Na2C4O4 powder.

Table S1. Experimental vibrational bands of Na2C4O4 salt with respective tentative assignment

| Na2C4O4 salt | |
| --- | --- |
| Wavenumbers [cm-1] | Tentative assignment |
| 1803 | *v* (C=O) |
| 1644 | *v* (C=C) |
| 1606 | *v* (C=C) + *v* (C=O) |
| 1127 | *v* (C-C) |
| 729 | Ring breathing |
| 651 | δring |
| 307 | δ(CO) |

**2-Nitrogen adsorption-desorption isotherms at 77 K and pore size distribution of positive electrode carbon**

**
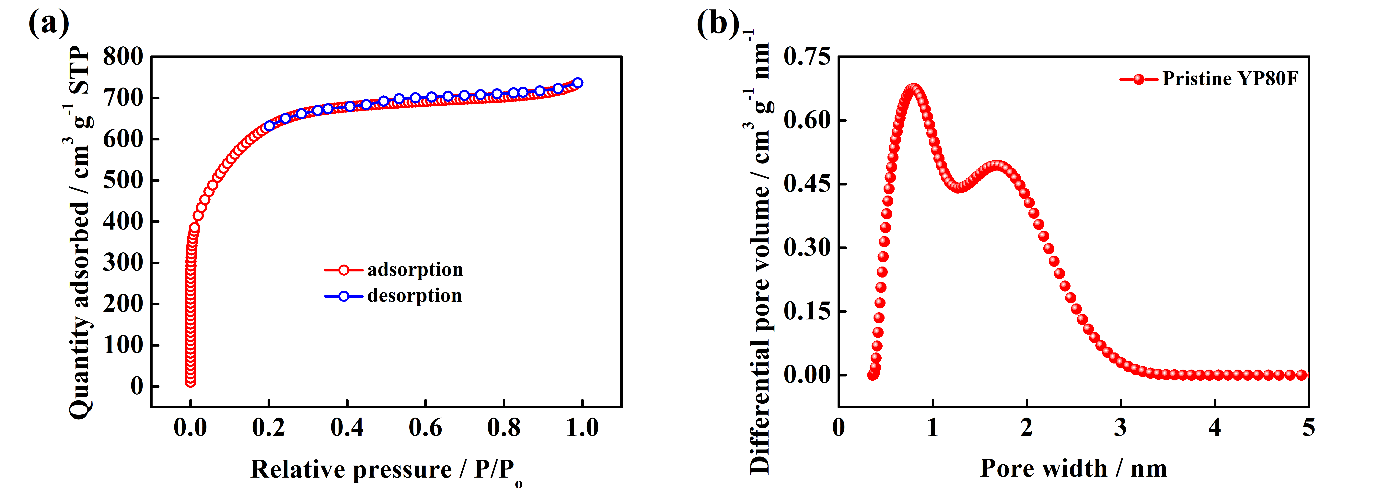
**

Fig. S2. (a) N2 adsorption-desorption isotherms of pristine activated carbon (YP80F) at 77 K, (b) pore size distribution of pristine activated carbon (YP80F).

**3-Galvanostatic discharge and charge of a HC (hard carbon) electrode.**


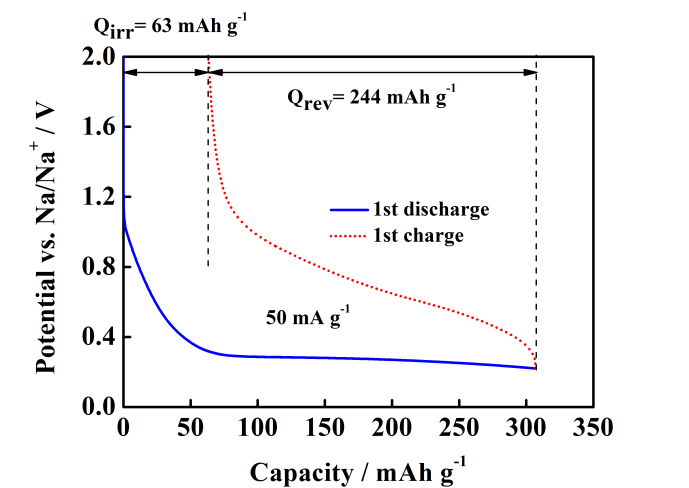


Fig. S3. Galvanostatic discharge and charge of a HC electrode at 50 mA g-1 using a sodium disk as counter/reference electrode and NaClO4; EC/PC as electrolyte.

Table S2. Calculation of negative/positive electrode capacity ratio of NIC

|  | **Na2C4O4** | **YP80F** | **HC** |
| --- | --- | --- | --- |
| Mass of materials | 5.31 mg | 4.13 mg | 5.34 mg |
| Capacity of materials | 340 mAh g-1 | 60 mAh g-1 | 358 mAh g-1 |
| Electrode capacity | 1.805 mAh | 0.248 mAh | 1.912 mAh |
| Electrode capacity ratio (negative/positive) | 7.7 | | |

**4-Impedances of sodium ion capacitor**


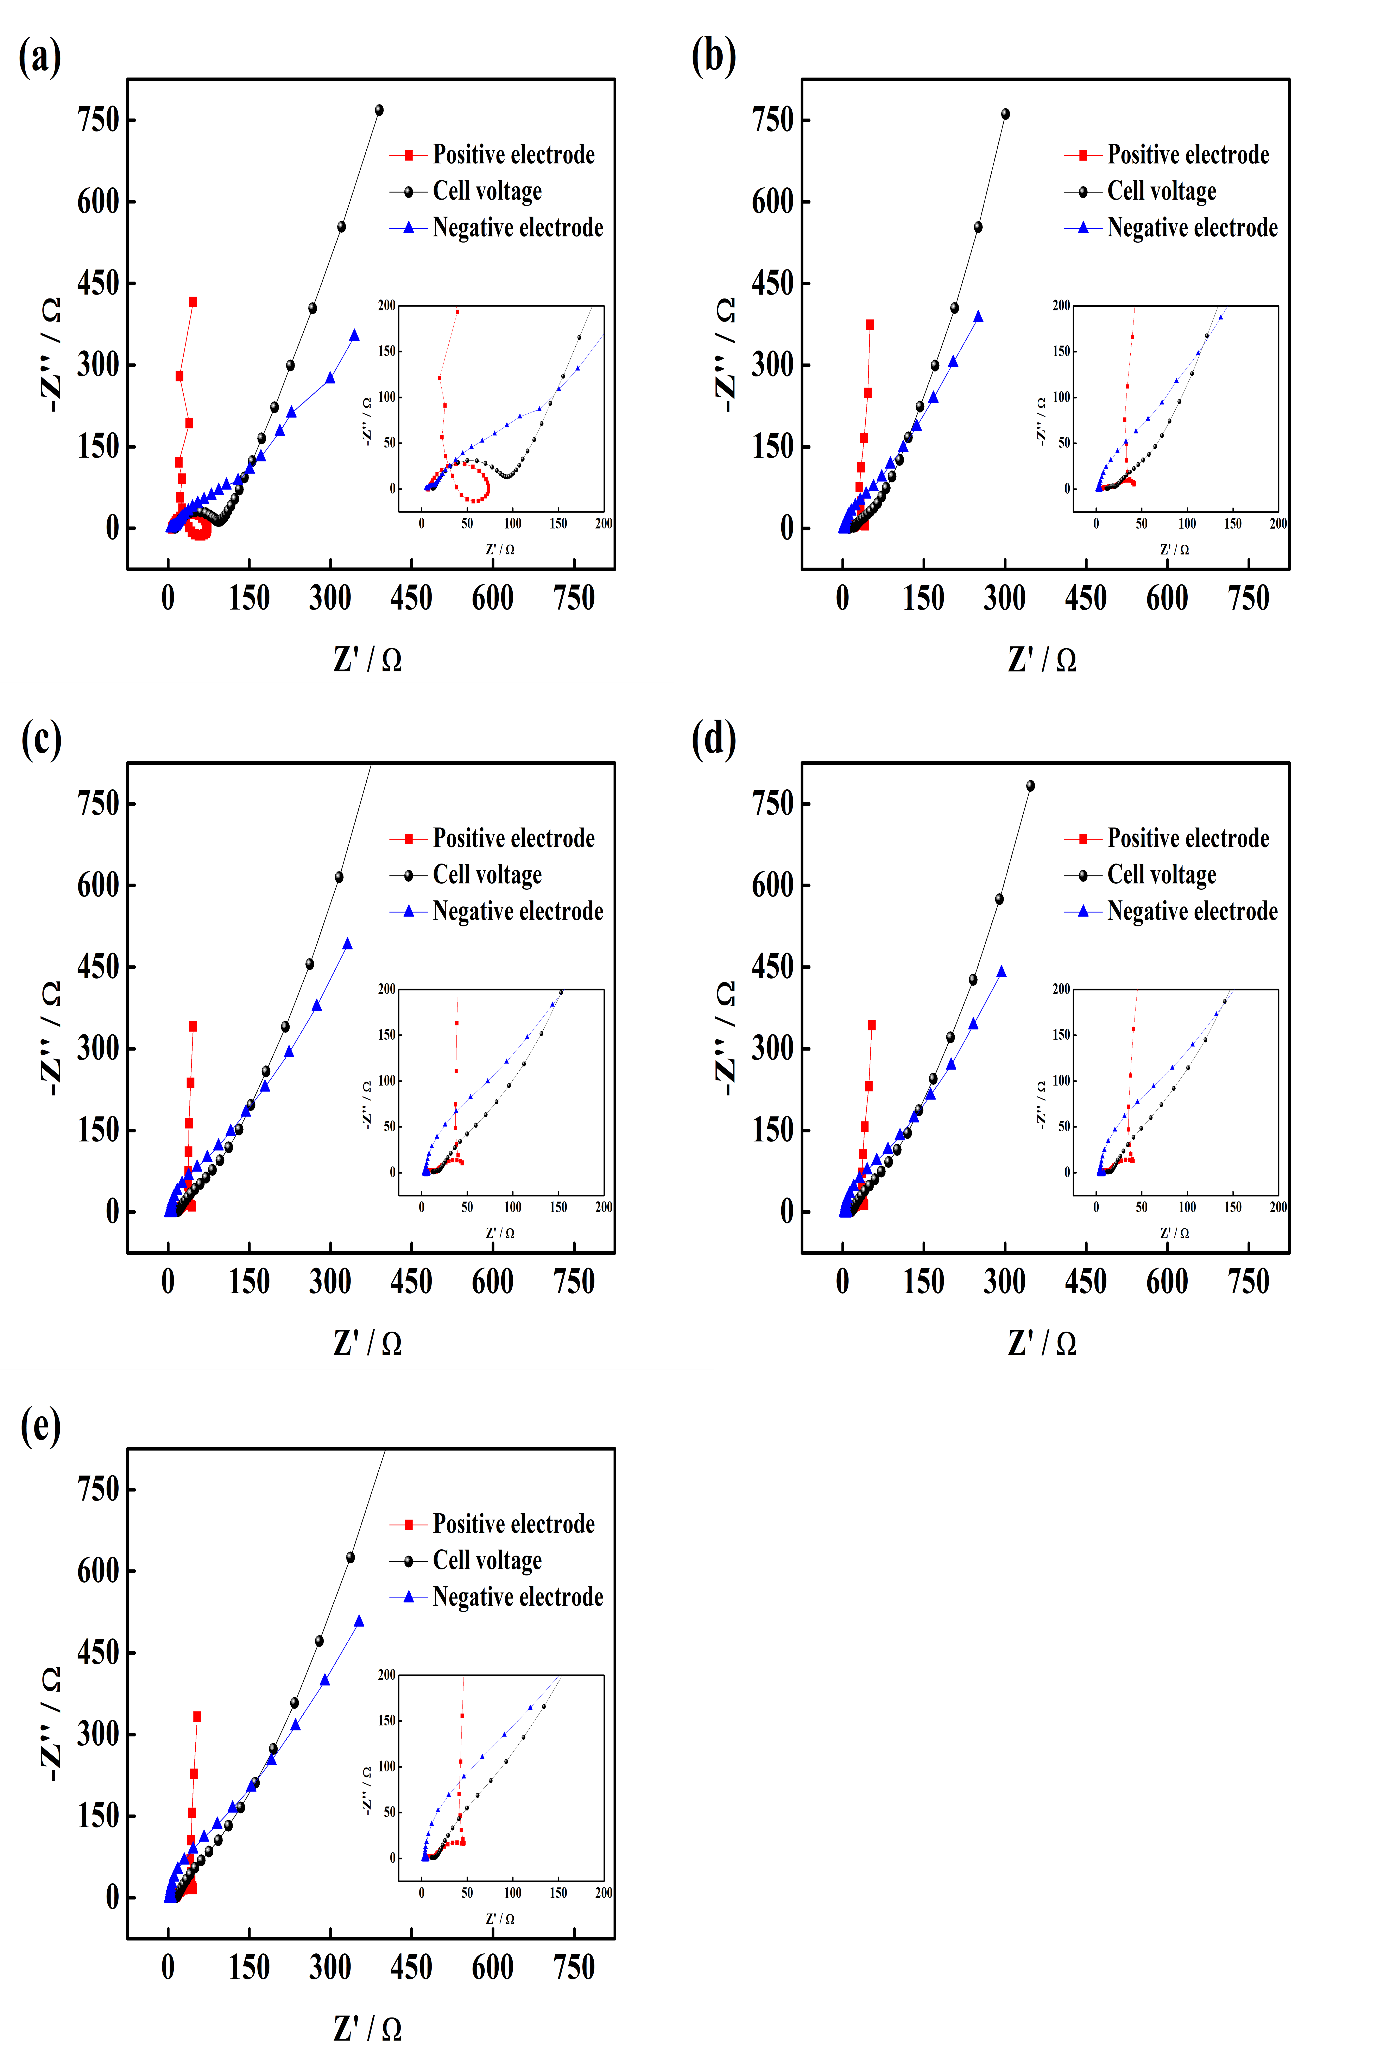
Fig. S4**.** Impedance of YP80F//Na2.15(HC) NIC (a) before cycle, (b) after 500 cycles. The black, red and blue lines represent the impedance of cell voltage, positive and negative electrodes, respectively. The electrolyte was NaClO4; EC/PC and a sodium pin was used as reference electrode.

**5-ESR and EDR of cell from discharge curve and impedance**


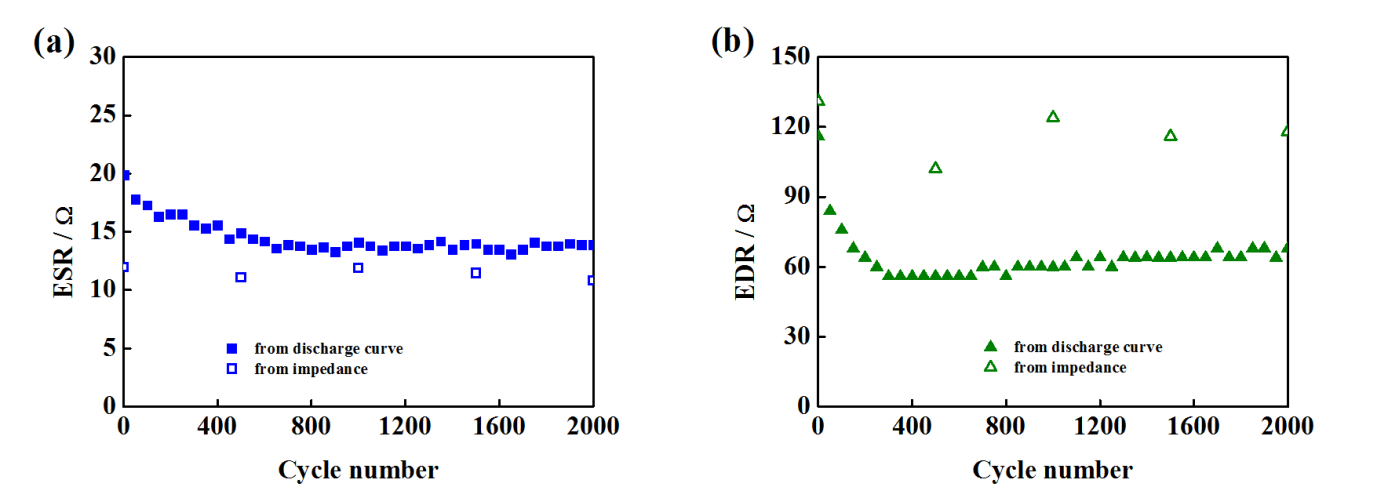


Fig. S5. ESR and EDR of YP80F//Na2.15(HC) NIC from discharge curve and impedance during cycling.

**Table S1** The electrochemical performance comparison of NIC with other reported anode materials in NICs.

| Types of materials | Cycling performance | | Rate performance | | Ref. |
| --- | --- | --- | --- | --- | --- |
| Capacity(mAh g-1)/cycles | Current (A g-1) | Energy density (Wh kg-1) | Power density (W kg-1) |
| RGO400 | 166/100 | 1 | 48 | 10896 | [19] |
| MnS Nanocubes | 357/1000 | 1 | 49 | 5136 | [20] |
| TiN | 160/100 | 0.1 | 38 | 4400 | [21] |
| FeVO | 153/4000 | 0.1 | 20 | 5200 | [22] |
| Doped Carbon | 260/10000 | 0.4 | 13.7 | 180 | [23] |
| MoS2-Carbon | 29.2/10000 | 2 | 40.4 | 2500 | [24] |
| TiO2/Sheared  CNT | 136/1000 | 0.3 | 54.9 | 1410 | [25] |
| **This work** | **333/13600** | **1** | **59** | **1500** |  |
